# Supplementary material
Source: Springer Nature journal article supplement (https://www.springermedizin.de/resource/supplementary/12874_2007_287_MOESM1_ESM.pdf/9434166)
Supplement: MOESM1 [file 9434166]

Postmenopausal women aged 50-64 years. Postal questionnaire including trial introduction, invitation to participate (n=39 713)

No response, wrong address, dead

Wants to participate (n=6 605)

Found ineligible

Randomization (n=4 295)  
(Blind: HT or Placebo, Non-blind: HT or Non-treatment)

Invited to examination  
Blind sub-study  
(n=2 136)

Invited to examination  
Non-blind sub-study  
(n=2 159)

Found ineligible  
No examination visit  
No informed consent

Found ineligible  
No examination visit  
No informed consent

Included  
Blind HT  
(n=415)

Included  
Blind Placebo  
(n=381)

Included  
Non-blind HT  
(n=503)

Included  
No treatment  
(n=524)
